# Supplementary material for: The combination of circulating long noncoding RNAs AK001058, INHBA-AS1, MIR4435-2HG, and CEBPA-AS1 fragments in plasma serve as diagnostic markers for gastric cancer
Source: PubMed Central journal article supplement (PMC5400602; doi:10.18632/oncotarget.15628), 2017-02-22
Supplement: oncotarget-08-21516-s001.pdf [file oncotarget-08-21516-s001.pdf]

## The combination of circulating long noncoding RNAs AK001058, INHBA-AS1, MIR4435-2HG, and CEBPA-AS1 fragments in plasma serve as diagnostic markers for gastric cancer

### Supplementary Materials

**Supplementary Table 1: The information for selected 9 lncRNA**

| gene name    | seqname   | chromosome | ncRNA type               | antisense RNA |
|--------------|-----------|------------|--------------------------|---------------|
| AK001058     | AK001058  | chr5       | intergenic               |               |
| INHBA-AS1    | NR_027119 | chr7       | intronic antisense       | INHBA         |
| MIR4435-2HG  | NR_015395 | chr2       | intergenic               |               |
| LINC01184    | NR_024125 | Chr1       | nature anstisense        |               |
| MGC12916     | NR_026880 | chr17      | intron sense-overlapping | HS3ST3B1      |
| CEBPA-AS1    | NR_026887 | chr19      | bidirectional            | CEBPA         |
| UCA1         | NR_015379 | chr19      | intergenic               |               |
| FLJ37453     | NR_024279 | chr1       | natural antisense        | POMZP3        |
| LOC100133091 | NR_029411 | chr7       | natural antisense        |               |

**Supplementary Table 2: The area under the curve of 3-lncRNA signature randomly chose from 5 lncRNAs in training set**

|       | AUC   | sensitivity | specificity | <i>p</i> -value |
|-------|-------|-------------|-------------|-----------------|
| I+M+U | 0.898 | 0.843       | 0.868       | < 0.0001        |
| I+C+U | 0.833 | 0.765       | 0.849       | < 0.0001        |
| I+U+A | 0.828 | 0.706       | 0.868       | < 0.0001        |
| M+C+U | 0.869 | 0.784       | 0.906       | < 0.0001        |
| M+U+A | 0.892 | 0.824       | 0.925       | < 0.0001        |
| C+U+A | 0.814 | 0.843       | 0.736       | < 0.0001        |

Abbreviations: I, INHBA-AS1; M, MIR4435-2HG; C, CEBPA-AS1; U, UCA1; A, AK001058; lncRNA, long noncoding RNA.

**Supplementary Table 3: The area under the curve of 2-lncRNA signature randomly chose from 5 lncRNAs in training set**

|     | AUC   | sensitivity | specificity | <i>p</i> -value |
|-----|-------|-------------|-------------|-----------------|
| I+M | 0.903 | 0.702       | 0.976       | < 0.0001        |
| I+C | 0.838 | 0.745       | 0.878       | < 0.0001        |
| I+U | 0.836 | 0.787       | 0.854       | < 0.0001        |
| I+A | 0.864 | 0.766       | 0.902       | < 0.0001        |
| M+C | 0.885 | 0.745       | 0.902       | < 0.0001        |
| M+U | 0.897 | 0.894       | 0.829       | < 0.0001        |
| M+A | 0.898 | 0.723       | 0.976       | < 0.0001        |
| C+U | 0.794 | 0.745       | 0.805       | < 0.0001        |
| C+A | 0.852 | 0.809       | 0.902       | < 0.0001        |
| U+A | 0.844 | 0.809       | 0.872       | < 0.0001        |

Abbreviations: I, INHBA-AS1; M, MIR4435-2HG; C, CEBPA-AS1; U, UCA1; A, AK001058; lncRNA, long noncoding RNA.

**Supplementary Table 4: The area under the curve of 2-lncRNA randomly chose from 4 lncRNAs in testing set**

|     | AUC   | sensitivity | specificity | <i>p</i> -value |
|-----|-------|-------------|-------------|-----------------|
| I+M | 0.829 | 0.915       | 0.596       | < 0.0001        |
| I+C | 0.832 | 0.596       | 0.904       | < 0.0001        |
| I+A | 0.828 | 0.809       | 0.673       | < 0.0001        |
| M+C | 0.868 | 0.957       | 0.615       | < 0.0001        |
| M+A | 0.880 | 0.915       | 0.731       | < 0.0001        |
| C+A | 0.844 | 0.723       | 0.808       | < 0.0001        |

Abbreviations: I, INHBA-AS1; M, MIR4435-2HG; C, CEBPA-AS1; A, AK001058; lncRNA, long noncoding RNA.

**Supplementary Table 5: The primers of genes used in the paper**

| Gene names     | Forward (5'-3')      | Reverse (5'-3')      |
|----------------|----------------------|----------------------|
| 18S rRNA       | GTAACCCGTTGAACCCCAT  | CCATCCAATCGGTAGTAGCG |
| INHBA-AS1      | CCTACTACACACAGGGGCTC | TTCCAGAAGCTCCTCATGGG |
| MIR4435-2HG    | GTGTAGGAGAGTCGGCCTTC | TTGGGCTGGGATAGTGTCT  |
| CEBPA-AS1      | TGCGTCCCTCGCATTCTTTA | GACAGGAGACACTTGAGGGC |
| UCA1           | AACCATCAGATCCTTGCCCA | AATATGTGGAAGTGGCCCCA |
| AK001058       | CTGCTTTGCCATTTCCCTT  | GTTGATGCCACACAGAGGGA |
| LOC100133091   | AGAGTCACTGGGCTACACAC | CCATCAGGCCCAGTATTCTT |
| LINC01184      | GAGAAGTGCAGTTGAGTCGC | CCTTACCCTTCCACTGAGCA |
| FLJ37453       | CTTGCAAGCCCTTCGAAAGT | TTCCACGGCTGAGTTCTAG  |
| MGC12916       | AGCCATCTCCCTGAACTGAC | AGTTGCGGCATTTACAGTGG |
| MIR4435-2HG -a | GACATTCCAGACAAGCGGTG | TCCACTTTGCTTGTGAGGGA |
| MIR4435-2HG -b | GTGTAGGAGAGTCGGCCTTC | TTGGGCTGGGATAGTGTCT  |
| MIR4435-2HG -c | ACCCTGTGAGCATGATTGGA | CTCAAAGACCCAGATGCCG  |
| MIR4435-2HG -d | ACTCTGAAACTACCCGGCTC | GTCAACGCGGAAAAGACACT |
| MIR4435-2HG -e | TGTCACAACACAACGCTGAG | CTCGCGGTGAACTTGGCC   |
| MIR4435-2HG -f | TAGTGTCTTGCTGGCCTGAA | GCTTAGGAGGGAGAGACACC |
| MIR4435-2HG -g | TCCAAGAGAGCTGGACAGAC | TTAAGCAATCTGGGGTGGCT |
| MIR4435-2HG -h | CATCTCGACAGTGCTTCTT  | TTTAGAGGAGCAGAGCAGGG |
| MIR4435-2HG -i | GAGTGCCACCTATGACCTCA | TGTAGACATCCTCAGGCTCG |
| MIR4435-2HG -j | GCAGAAGGTGGGGAGGATAA | GGCCCCTTCATAGCTCAGAA |
| MIR4435-2HG -k | TGAACCTAGGTCAGTCTGGC | ACTGGTGGCTACAAAGGTGA |
| MIR4435-2HG -l | TTCAGCTGCAAGACGTATGC | TTCTGACATCATGGAGGCC  |
| MIR4435-2HG -m | AGCCCAGTCAAGAGAGGATG | CCTCACTCCGCTTCTCTAGT |

**Supplementary Table 6: The clinical parameters of GC patients and tumors**

| sample | Gender | Age | Tumor grade | Depth of invasion | LN metastasis | TNM stage |
|--------|--------|-----|-------------|-------------------|---------------|-----------|
| 1      | male   | 71  | low         | T3                | N3b           | IV        |
| 2      | female | 72  | low         | T3                | N1            | III       |
| 3      | male   | 73  | Middle      | T3                | N3            | IV        |
| 4      | female | 47  | low         | T2                | N0            | IA        |
| 5      | male   | 53  | Middle      | T2                | N0            | I         |
| 6      | male   | 68  | Middle      | T3                | N3            | IV        |
| 7      | female | 57  | low         | T2                | N0            | IB        |
| 8      | female | 65  | low         | T2                | N0            | IB        |
| 9      | male   | 58  | Middle      | T4                | N1            | IV        |
| 10     | male   | 62  | low         | T3                | N2            | IV        |
| 11     | male   | 59  | low         | T3                | N3b           | IV        |
| 12     | male   | 57  | low         | T3                | N3a           | IV        |
| 13     | female | 61  | low         | T1                | N0            | I         |
| 14     | female | 57  | low         | T4                | N3b           | IV        |
| 15     | male   | 54  | low         | T4a               | N3a           | IV        |
| 16     | male   | 86  | Middle      | T1                | N0            | I         |
| 17     | male   | 61  | low         | T1                | N0            | I         |
| 18     | male   | 72  | low         | T3                | N3a           | IV        |
| 19     | male   | 62  | Middle      | T3                | N3            | IV        |
| 20     | male   | 57  | Middle      | T4a               | N2            | IV        |
| 21     | male   | 56  | low         | T2                | N0            | IB        |
| 22     | male   | 50  | low         | T4a               | N1            | IV        |
| 23     | female | 72  | low         | T2                | N0            | IB        |
| 24     | male   | 77  | Middle      | T1                | N0            | IA        |
| 25     | male   | 64  | Middle      | T2                | N2            | II        |
| 26     | male   | 48  | low         | T4a               | N3b           | IV        |
| 27     | female | 76  | Middle      | T2                | N0            | IB        |
| 28     | male   | 62  | Middle      | T1                | N0            | I         |
| 29     | female | 74  | low         | T2                | N0            | IB        |
| 30     | female | 64  | Middle      | T2                | N1            | II        |
| 31     | male   | 64  | low         | T3                | N3            | IV        |
| 32     | male   | 52  | Middle      | T2                | N0            | IB        |
| 33     | female | 72  | low         | T3                | N1            | III       |
| 34     | male   | 60  | Middle      | T2                | N1            | IB        |
| 35     | female | 56  | low         | T3                | N3a           | IV        |
| 36     | male   | 73  | low         | T3                | N1            | IV        |
| 37     | female | 59  | Middle      | T4a               | N3            | IV        |
| 38     | female | 67  | low         | T2                | N0            | IB        |
| 39     | female | 64  | low         | T2                | N0            | IA        |
| 40     | male   | 66  | low         | T2                | N0            | IB        |
| 41     | female | 50  | low         | T3                | N3b           | IV        |
| 42     | male   | 64  | Middle      | T3                | N2            | IV        |
| 43     | male   | 58  | low         | T4a               | N2            | IV        |
| 44     | female | 66  | High        | T3                | N1            | III       |
| 45     | male   | 81  | low         | T3                | N1            | III       |
| 46     | male   | 69  | Middle      | T3                | N2            | IV        |
| 47     | male   | 47  | Middle      | T3                | N2            | IV        |
| 48     | male   | 70  | Middle      | T3                | N1            | III       |
| 49     | female | 65  | High        | T2                | N1            | IB        |

**Supplementary Table 7: The clinical parameters of GC patients and tumors in training set**

| sample | Gender | Age | Tumor size      | Tumor grade | Depth of invasion | LN metastasis | TNM stage |
|--------|--------|-----|-----------------|-------------|-------------------|---------------|-----------|
| 1      | male   | 67  | 3.0 × 2.0 × 1.0 | Middle      | T4a               | N1            | IIIC      |
| 2      | female | 36  | 1.5 × 1.0 × 1.0 | Middle      | T4                | N2            | IV        |
| 3      | male   | 65  | 4.5 × 3.5 × 1.0 | low         | T2                | N2            | IIB       |
| 4      | female | 59  | 1.2 × 1.0 × 0.2 | Middle      | T1-2              | N0            | I         |
| 5      | female | 39  | 4.0 × 3.0 × 1.5 | low         | T4                | N1            | IV        |
| 6      | male   | 71  |                 | Middle      |                   |               |           |
| 7      | male   | 58  | 3.5 × 2.5 × 1.5 | Middle      | T4                | N3            | IIIC      |
| 8      | female | 68  | 5.0 × 5.0 × 1.0 | Middle      | T2                | N0            | IB        |
| 9      | female | 55  | 1.5 × 1.2 × 1.0 | High        | T1                | N0            | IA        |
| 10     | male   | 71  | 6.0 × 5.0 × 1.5 | Middle      | T4b               | Nx            | IIIC      |
| 11     | male   | 60  | 1.5 × 1.3 × 0.3 | Middle      | T1                | N0            | IA        |
| 12     | male   | 37  |                 | Middle      | T2                | N0            | IV        |
| 13     | male   | 73  | 2.0 × 1.3 × 0.5 | Middle      | T2b               | N0            | IB        |
| 14     | male   | 75  | 7.0 × 6.0 × 1.0 | Middle      | T4                | N1            | IIIA      |
| 15     | female | 51  | 4.0 × 3.0 × 0.6 | low         | T4                | N3            | IV        |
| 16     | female | 51  | 4.0 × 3.0 × 2.0 | Middle      | T4                | N1            | IIIA      |
| 17     | male   | 77  | 5.0 × 4.0 × 1.0 | Middle      | T4                | NX            | IV        |
| 18     | male   | 61  | 0.2 × 0.2 × 0.1 | low         | T2                | N0            | IB        |
| 19     | male   | 55  | 3.5 × 2.2 × 1.0 | Middle      | T4b               | N3a           | IIIC      |
| 20     | female | 70  |                 | low         | T4                | N2            | IV        |
| 21     | female | 43  |                 | Middle      | T2                | N1            | II        |
| 22     | male   | 65  | 6.0 × 5.0 × 2.0 | low         | T4b               | N3            | IIIC      |
| 23     | male   | 64  | 9.5 × 6.0 × 1.0 | Middle      | T2                | N0            | IB        |
| 24     | male   | 47  | 1.6 × 0.3 × 0.2 | low         | T1a               | N0            | IA        |
| 25     | male   | 37  | 6.0 × 5.0       | low         | T4                | N1            | IV        |
| 26     | male   | 58  | 4.5 × 5.0 × 1.5 | High        | T4                | Nx            | IV        |
| 27     | male   | 52  | 4.0 × 3.5 × 1.0 | low         | T4                | N3            | IV        |
| 28     | female | 65  |                 | low         | T3                | N2            | III       |
| 29     | female | 70  |                 | low         | T3                | N2            | III       |
| 30     | male   | 68  | 4.0 × 3.0 × 2.0 | low         | T1                | N0            | I         |
| 31     | male   | 65  | 6.0 × 6.0       |             |                   |               |           |
| 32     | male   | 74  | 7.0 × 6.0       | low         | T3                | N1            | IIIA      |
| 33     | female | 62  | 2.0 × 1.3 × 0.4 | Middle      | T1                | N1            | I         |
| 34     | female | 64  |                 | Middle      | T2                | N1            | II        |
| 35     | male   | 55  |                 | low         | T3                | N1            | IIIC      |
| 36     | male   | 64  |                 | low         | T4                | Nx            | IV        |
| 37     | male   | 69  | 4.0 × 3.5 × 1.5 | low         | T4                | N2            | IIB       |
| 38     | male   | 58  | 6.5 × 3.5 × 0.3 | low         | T1                | N0            | IA        |
| 39     | female | 63  | 8.0 × 1.5       | low         | T4                | N1            | III       |
| 40     | female | 54  |                 | Middle      | T2                | N1            | II        |
| 41     | male   | 69  |                 |             |                   |               |           |
| 42     | male   | 57  | 8.0 × 6.0 × 1.0 | low         | T4b               | N2            | IV        |
| 43     | male   | 47  |                 | Middle      | T3                | N2            | III       |
| 44     | male   | 78  | 7.0 × 6.0 × 1.5 | low         | T2                | N0            | IB        |
| 45     | male   | 59  | 1.5 × 1.3 × 0.4 | low         | T2                | N0            | IB        |
| 46     | male   | 56  |                 | low         | T2                | N0            | I         |
| 47     | male   | 45  |                 | low         | T2                | N2            | II        |
| 48     | male   | 72  |                 | low         | T4                | N2            | IV        |
| 49     | male   | 86  |                 | low         | T3                | N2            | III       |
| 50     | male   | 43  |                 | Middle      | T2                | N1            | II        |
| 51     | female | 72  |                 | low         |                   |               |           |

**Supplementary Table 8: The clinical parameters of GC patients and tumors in testing set**

| sample | Gender | Age | Tumor size(cm)   | Depth of invasion | LN metastasis | Metastasis |
|--------|--------|-----|------------------|-------------------|---------------|------------|
| 1      | female | 71  | 3.0 × 3.0 × 1.0  | T3                | N3            |            |
| 2      | male   | 66  | 4.0 × 4.0 × 0.8  | T3                | N2            |            |
| 3      | male   | 63  | 11.0 × 7.0 × 5.5 | T3                | N0            |            |
| 4      | female | 76  | 3.5 × 3.0 × 0.3  | T3                | N2            |            |
| 5      | female | 69  | 4.5 × 2.0 × 1.0  | T3                | N2            |            |
| 6      | female | 55  | 7.8 × 6.0 × 0.8  | T3                | N0            |            |
| 7      | male   | 66  | 10.0 × 7.0 × 3.0 | T3                | N1            |            |
| 8      | male   | 56  | 3.0 × 2.5 × 0.3  | T3                | N1            |            |
| 9      | male   | 84  | 5.3 × 4.3 × 0.3  | T2                | N1            |            |
| 10     | female | 60  | 4.5 × 3.8 × 0.4  | T3                | N2            |            |
| 11     | male   | 61  | 4.0 × 3.0 × 1.0  | T3                | N1            |            |
| 12     | female | 53  | 4.0 × 4.0 × 0.8  | T3                | N2            |            |
| 13     | male   | 64  | 3.0 × 2.8 × 0.6  | T3                | N2            |            |
| 14     | male   | 58  | 5.0 × 4.0 × 0.5  | T3                | N2            |            |
| 15     | male   | 54  | 5.0 × 5.0 × 0.5  | T2                | N0            |            |
| 16     | female | 56  | 5.0 × 4.0 × 1.0  | T2                | N2            |            |
| 17     | male   | 56  | 3.0 × 3.0 × 0.5  | N1                | N1            |            |
| 18     | male   | 54  | 3.0 × 3.0 × 0.2  | N3                | N3            |            |
| 19     | male   | 35  | 6.0 × 4.0 × 1.0  | N0                | N0            |            |
| 20     | male   | 74  | 14.0 × 3.5 × 2.8 | N1                | N1            |            |
| 21     | male   | 61  | 8.0 × 5.5 × 2.0  | N2                | N2            |            |
| 22     | male   | 47  | 2.5 × 2.0 × 0.8  | N1                | N1            |            |
| 23     | male   | 51  | 2.5 × 2.5 × 1.2  | N0                | N0            |            |
| 24     | male   | 68  | 4.0 × 3.0 × 0.4  | N1                | N1            |            |
| 25     | male   | 59  | 3.0 × 2.5 × 0.5  | N2                | N2            |            |
| 26     | male   | 75  | 8.0 × 7.0 × 1.2  | N1                | N1            |            |
| 27     | male   | 51  | 5.5 × 4.5 × 0.8  | N3                | N3            | M1         |
| 28     | male   | 40  | 6.0 × 4.0 × 0.8  | N0                | N0            |            |
| 29     | female | 56  | 4.0 × 3.0 × 1.2  | N3                | N3            |            |
| 30     | male   | 57  | 4.0 × 3.0 × 1.2  | N2                | N2            |            |
| 31     | male   | 66  | 3.5 × 3.0 × 1.5  | N3                | N3            |            |
| 32     | male   | 48  |                  | N1                | N1            |            |
| 33     | female | 48  | 8.0 × 6.0 × 1.8  | N1                | N1            |            |
| 34     | male   | 62  | 10.0 × 7.0 × 2.0 | N2                | N2            |            |
| 35     | male   | 55  | 2.0 × 1.5 × 0.5  | N0                | N0            |            |
| 36     | male   | 52  | 6.0 × 5.0 × 3.0  |                   |               |            |
| 37     | male   | 81  | 7.0 × 5.0 × 1.5  | N0                | N0            |            |
| 38     | male   | 64  | 3.5 × 2.5 × 0.5  | N1                | N1            |            |
| 39     | male   | 59  | 4.0 × 3.0 × 1.0  | N2                | N2            |            |
| 40     | female | 68  | 6.5 × 4.0 × 1.0  | N3                | N3            |            |
| 41     | male   | 57  | 5.0 × 4.5 × 0.8  | N2                | N2            |            |
| 42     | male   | 67  |                  |                   |               |            |
| 43     | male   | 47  | 3.5 × 3.5 × 2.0  | N1                | N1            |            |
| 44     | male   | 69  | 10.0 × 8.0 × 1.0 | N3                | N3            |            |
| 45     | male   | 47  | 4.0 × 4.0 × 1.5  | N2                | N2            |            |
| 46     | male   | 59  | 5.5 × 5.0 × 2.5  | N0                | N0            |            |
| 47     | male   | 53  | 5.0 × 5.0 × 1.5  | N1                | N1            |            |

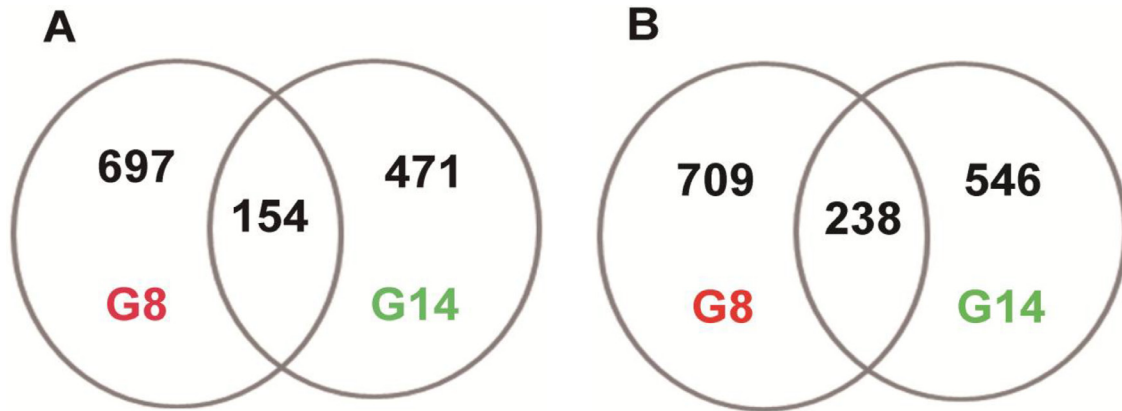

**Supplementary Figure 1: Numbers of lncRNAs aberrantly expressed in gastric tissue microarrays.** Numbers of aberrantly expressed lncRNAs increased (A) and decreased (B) in gastric tissue microarrays.

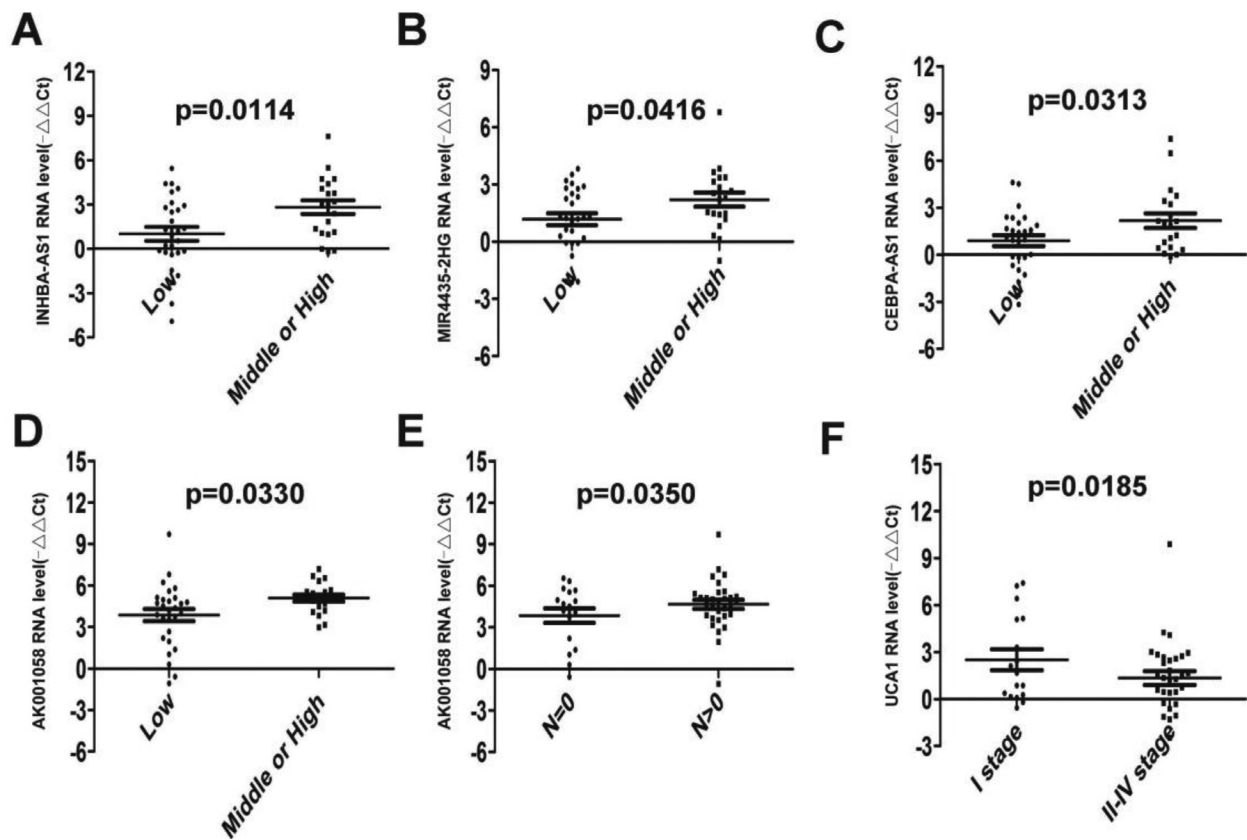

**Supplementary Figure 2: The relationship between lncRNA levels in gastric tissues and the clinicopathological features of GC patients.** The relationship between the expression level of INHBA-AS1 (A), MIR4435-2HG (B), CEBPA-AS1 (C), and AK001058 (D) and tumor grade; The relationship between the expression level of AK001058 and GC lymph node metastasis (E); The relationship between the expression level of UCA1 and GC TNM stage (F).  $-\Delta\Delta Ct = (Ct_{\text{target gene in normal}} - Ct_{18S \text{ rRNA in normal}}) - (Ct_{\text{target gene in cancer}} - Ct_{18S \text{ rRNA in cancer}})$ .

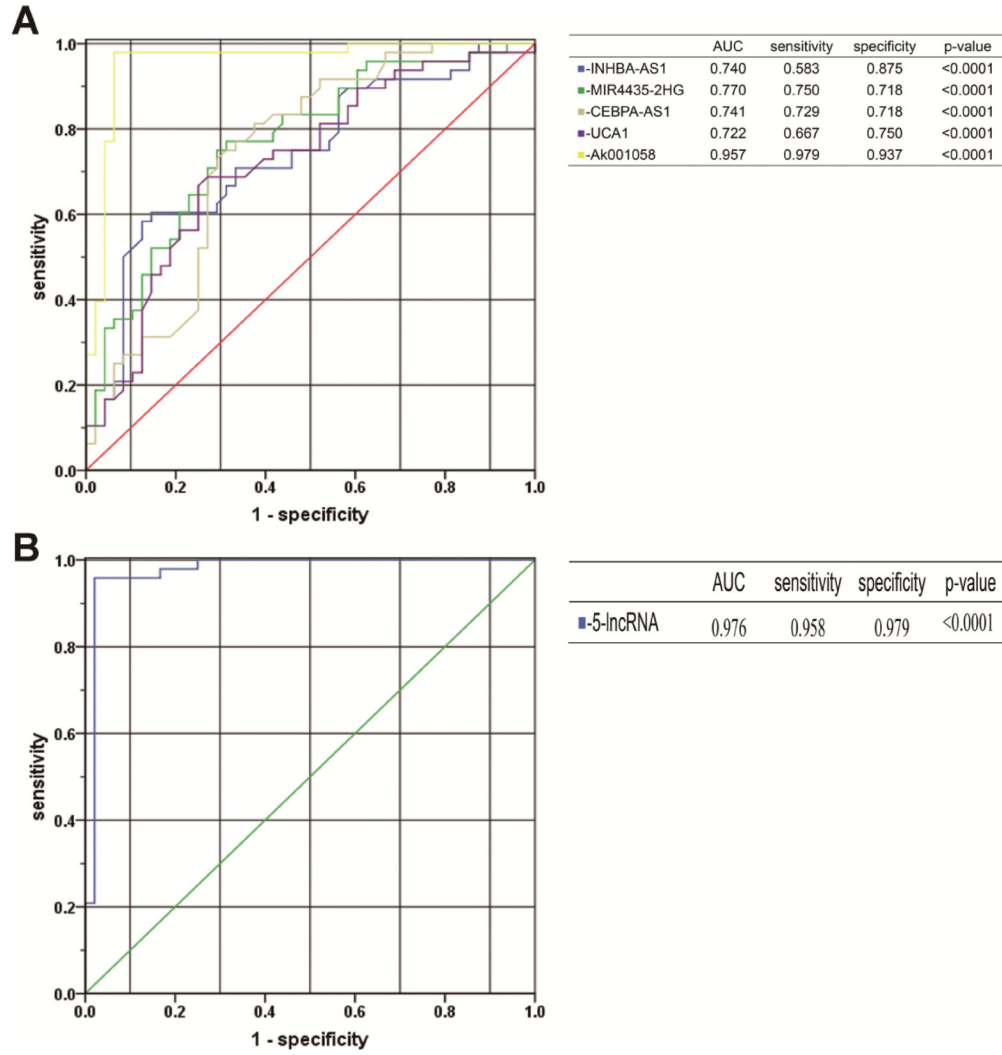

**Supplementary Figure 3: AUC for 5 lncRNAs and 5-lncRNA panel in gastric tissues.** The ROC curves of the 5 lncRNAs (A) and 5-lncRNAs (B) expressed in gastric tissues.

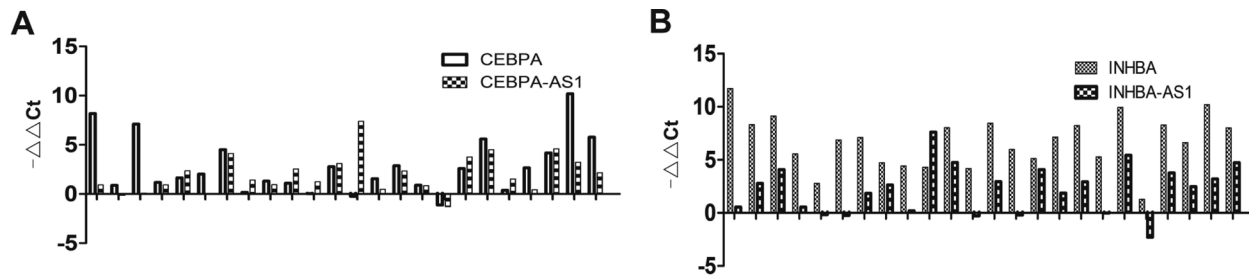

**Supplementary Figure 4: The expression levels of lncRNAs and their associated PCGs in gastric tissues.** Expression of CEBPA-AS1 (A), INHBA-AS1 (B) and their associated PCGs in 24 paired gastric tissues, respectively.  $-\Delta\Delta Ct = (Ct_{\text{target gene in normal}} - Ct_{18S \text{ rRNA in normal}}) - (Ct_{\text{target gene in cancer}} - Ct_{18S \text{ rRNA in cancer}})$ .
